# Supplementary material for: Chromatin accessibility analysis reveals regulatory dynamics of developing human retina and hiPSC-derived retinal organoids
Source: PubMed Central journal article supplement — Sci Adv. 2020 Feb 7;6(6):eaay5247. doi: 10.1126/sciadv.aay5247 (PMC7007246; doi:10.1126/sciadv.aay5247), 2020-02-07
Supplement: aay5247_SM.pdf [file aay5247_SM.pdf]

## Supplementary Materials for

### Chromatin accessibility analysis reveals regulatory dynamics of developing human retina and hiPSC-derived retinal organoids

Haohuan Xie, Wen Zhang, Mei Zhang\*, Tasneem Akhtar, Young Li, Wenyang Yi, Xiao Sun, Zuqi Zuo, Min Wei, Xin Fang, Ziqin Yao, Kai Dong, Suijuan Zhong, Qiang Liu, Yong Shen, Qian Wu, Xiaoqun Wang, Huan Zhao, Jin Bao, Kun Qu\*, Tian Xue\*

\*Corresponding author. Email: xuetian@ustc.edu.cn (T.X.); qukun@ustc.edu.cn (K.Q.); zhangmei@ustc.edu.cn (M.Z.)

Published 7 February 2020, *Sci. Adv.* **6**, eaay5247 (2020)

DOI: 10.1126/sciadv.aay5247

#### This PDF file includes:

Fig. S1. Qualification of ATAC-seq data.

Fig. S2. Analysis of differential chromatin elements and RNA-seq data in developing human retina and ROs.

Fig. S3. Epigenetic and expression profiles of retinal cell type markers during retinal development stages.

Fig. S4. Identification of putative TFs involved in retinal differentiation.

Fig. S5. Functional assay of *THRA* and *NFIB* using RO electroporation.

Fig. S6. *NFIB*-regulated signaling pathways in retinal development.

Fig. S7. Transcriptional regulatory network during human retinal and RO development.

Fig. S8. Comparative analyses of human and murine epigenetic data during retinal development.

Fig. S9. Signaling pathways in different stages of retinal development in mouse and human.

Table S1. Primers in all experiments.

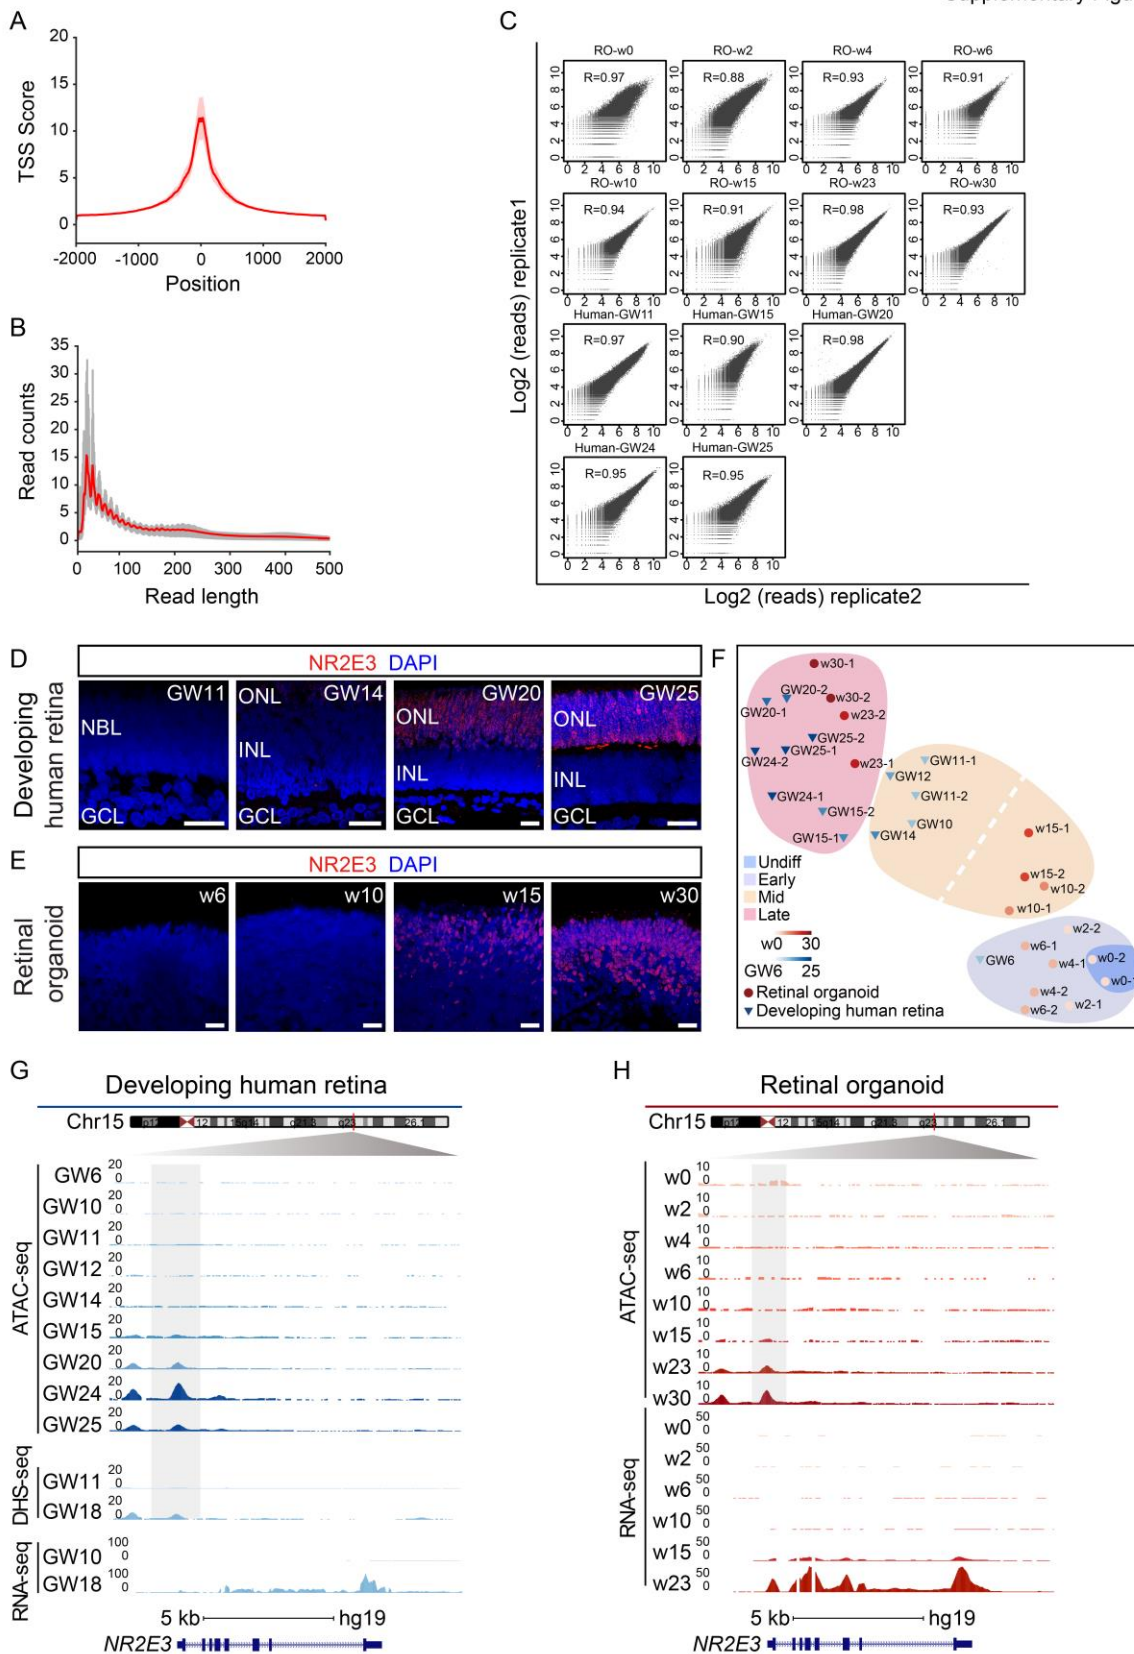

**Fig. S1. Qualification of ATAC-seq data.** (A) Quality control of transcription starting site (TSS) enrichment score of all samples in ATAC-seq data. Red curve indicates the average score for all data. (B) Quality control of fragment length distribution of all mapped reads in ATAC-seq data. Red curve indicates the average distribution for all data. (C) Scatter plots comparing the ATAC-seq signal between replicate samples in human retinae and ROs. The Pearson correlation coefficients are shown. (D and E) Immunostaining of NR2E3 (red) in human retinae (D) and ROs (E). Nuclei were stained with DAPI. NBL, neuroblastic layer; ONL, outer nuclear layer; INL, inner nuclear layer; GCL, ganglion cell layer. Scale bar, 20  $\mu$ m. (F) Chromatin accessibility analysis of human retinal and RO development visualized by UMAP with all the ATAC-seq data. Relevant developmental stages are labeled with distinct colors as Fig. 1A. (G and H) Normalized epigenetic and expression profiles at *NR2E3* loci during human retinal development (G) and RO differentiation (H). All signals were obtained from the UCSC genome browser.

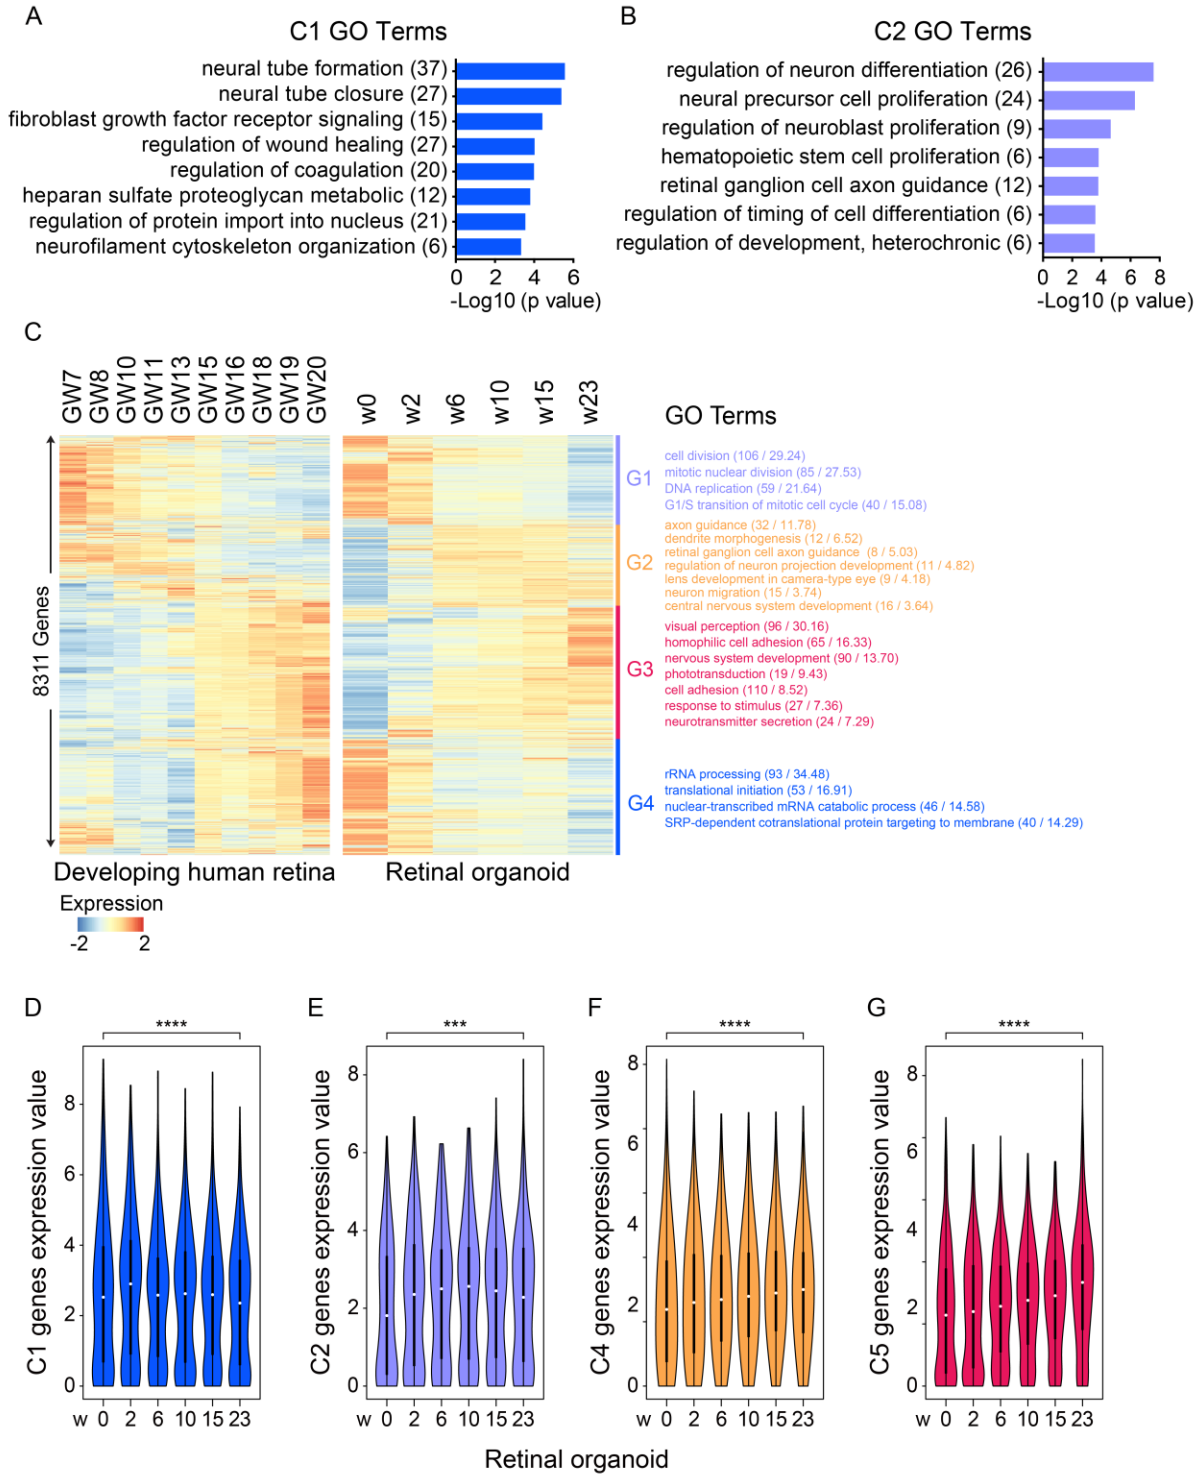

**Fig. S2. Analysis of differential chromatin elements and RNA-seq data in developing human retina and ROs.** (A) Significant GO terms enriched in C1 cluster peaks using GREAT v3.0.0. The number of genes enriched in GO terms is shown in the parenthesis. (B) Significant GO terms enriched in C2 cluster peaks using GREAT v3.0.0. The number of genes enriched in GO terms is shown in the parenthesis. (C) Heatmap of 8,311 differentially expressed genes during human retinal development and RO differentiation. Each column is a sample and each row is a gene. Color scale shows relative gene expression levels. GO terms of each cluster are shown on the right with the number of enriched genes and p values (Number of genes/p value). (D to G) Violin plot representing expression level of genes closest to the top 1,000 peaks in C1 (D), C2 (E), C4 (F) and C5 (G) during RO differentiation showing a variable but positive correlation between chromatin accessibility and gene expression. GREAT was used to annotate peaks to genes. Statistical significance was analyzed with one-way ANOVA, \*\*\*p < 0.001, \*\*\*\*p < 0.0001.

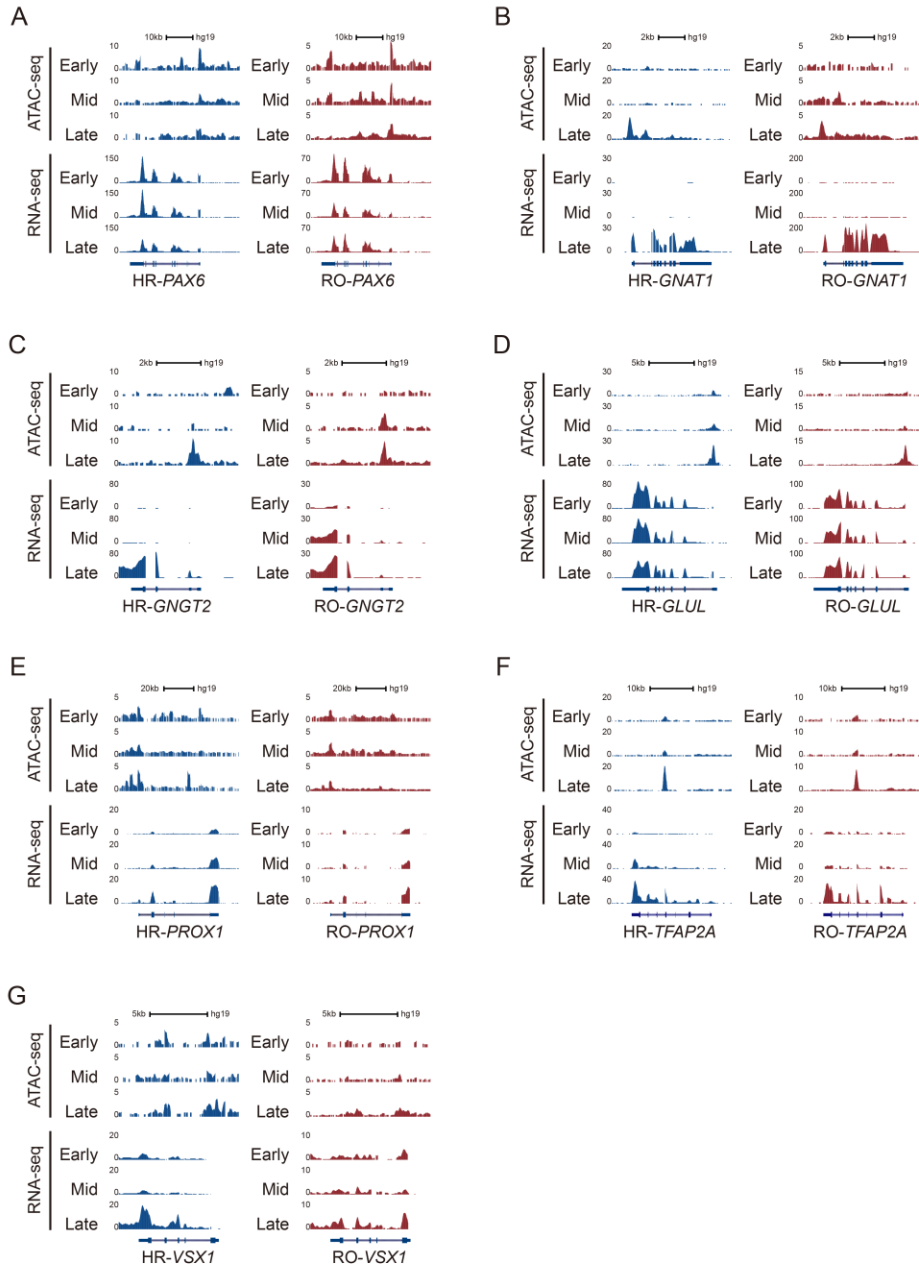

**Fig. S3. Epigenetic and expression profiles of retinal cell type markers during retinal development stages.** (A to G) Normalized epigenetic and expression profiles of different retinal cell type markers including *PAX6* for retinal progenitor cells (A), *GNAT1* for rods (B), *GNGT2* for cones (C), *GLUL* for müller cells (D), *PROX1* for horizontal cells (E), *TFAP2A* for amacrine cells (F) and *VSX1* for bipolar cells (G) were shown. All signals were obtained from the UCSC genome browser. Here we chose human GW6, GW10 and GW24 to represent the early, middle and late stages in epigenetic profiles and human GW7, GW10 and GW20 to represent the early, middle and late stages in expression profiles. In RO samples, we chose w6, w15 and w23 to represent the early, middle and late stages in both epigenetic and expression profiles. HR, human retinae; RO, retinal organoids.

Supplementary Figure 4

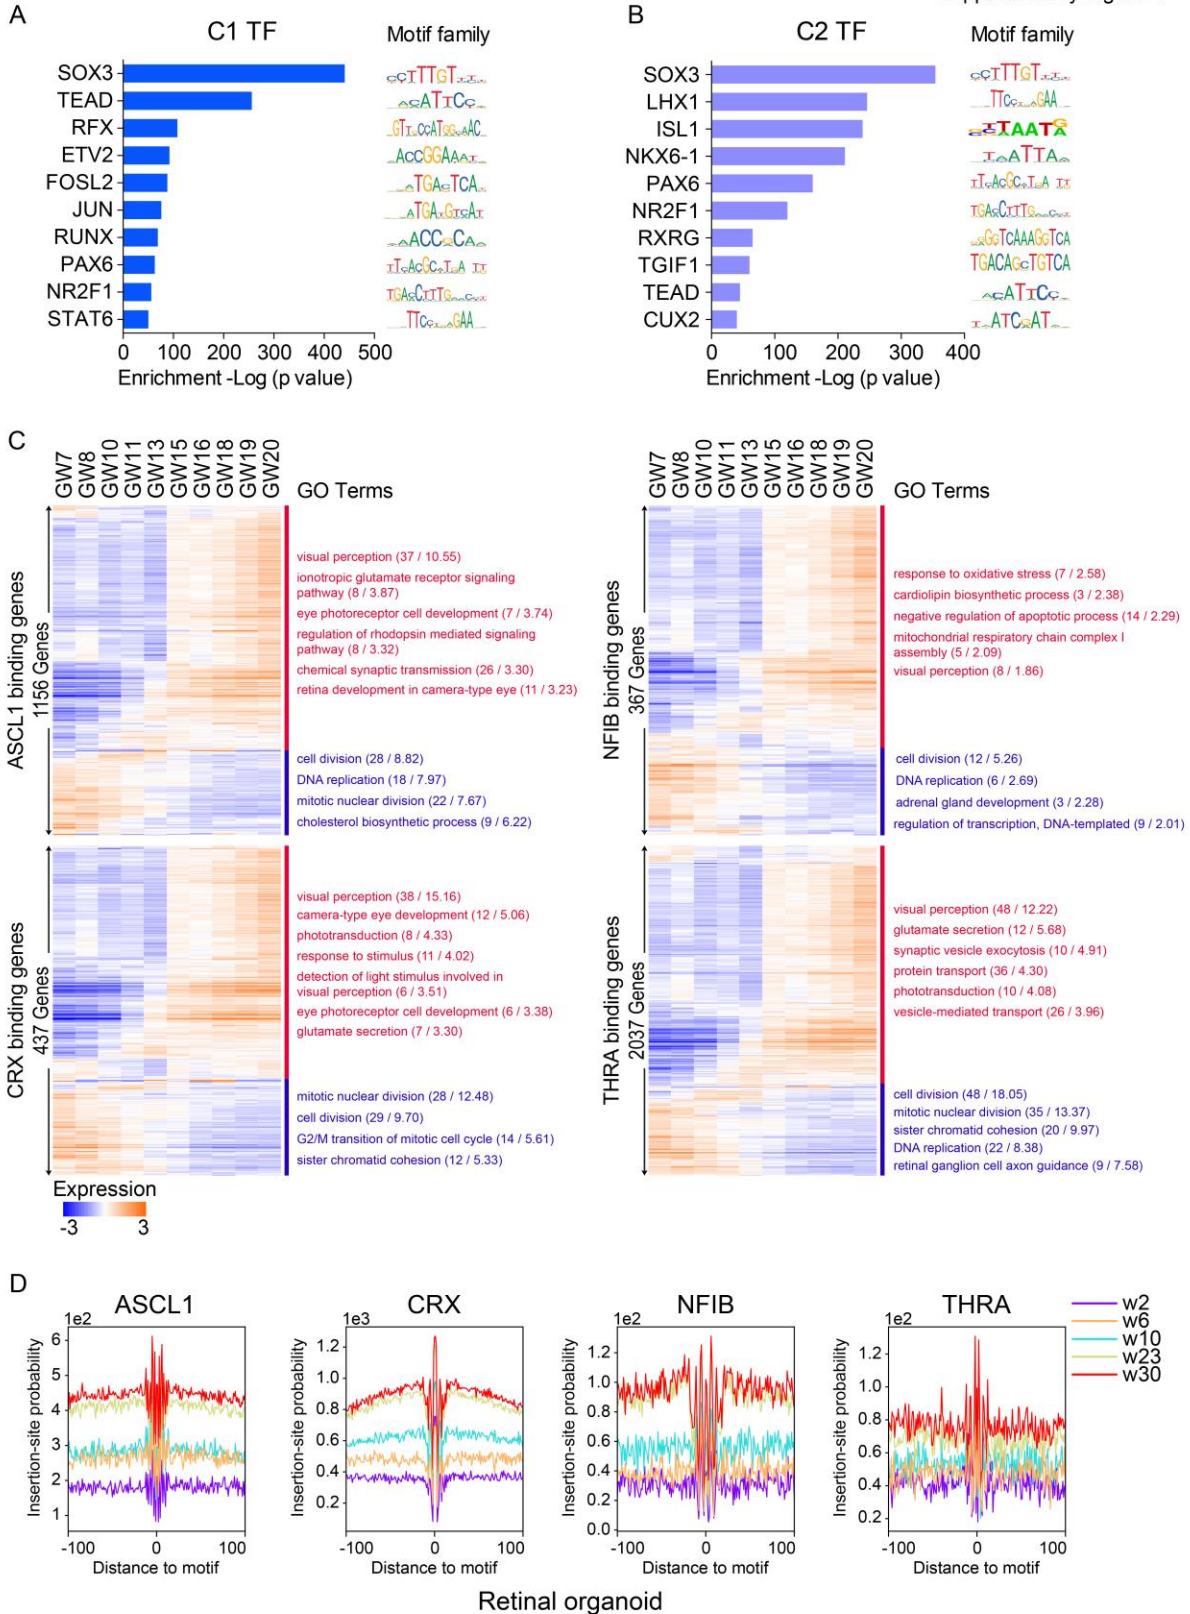



**Fig. S4. Identification of putative TFs involved in retinal differentiation.** (A and B) Top ten TF motifs enriched in C1 (A) and C2 (B) cluster peaks, with enrichment p values estimated from HOMER v4.8. (C) Heatmaps of expression profiles of genes predicted to be regulated by *ASCL1*, *CRX*, *NFIB*, and *THRA*. Unsupervised hierarchical clustering was performed. Significant GO terms enriched in up- and down-regulated genes are shown on the right with the number of enriched genes and p values (Number of genes/p value). (D) Visualization of ATAC-seq footprint for motifs *ASCL1*, *CRX*, *NFIB*, and *THRA* in ROs at five developmental stages. ATAC-seq signals across all motif binding sites in the C4 and C5 genome regions were aligned on the motif and averaged.

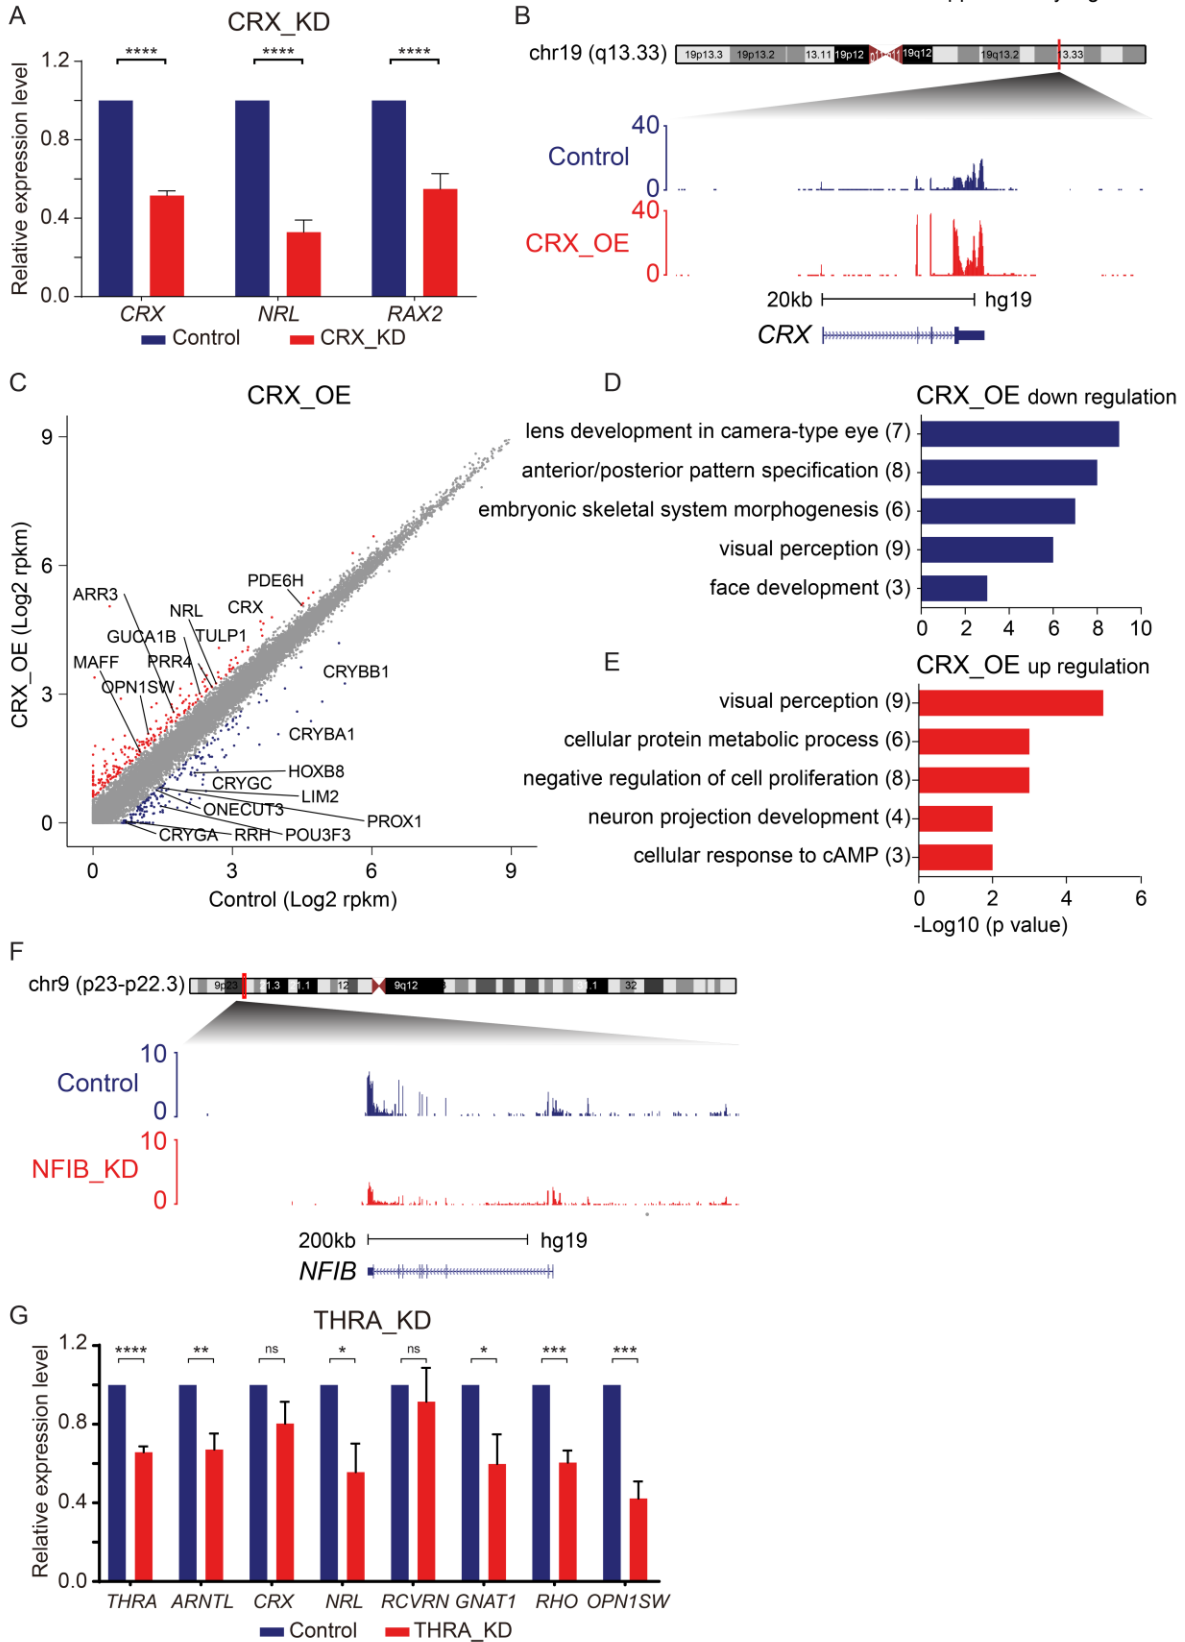

**Fig. S5. Functional assay of *THRA* and *NFIB* using RO electroporation.** (A) qRT-PCR analysis of the target gene expression level after *CRX* knockdown (n = 4). Data are means  $\pm$  SEM. (B) Normalized expression profiles at *CRX* loci between Control and CRX\_OE groups. All signals were obtained from the UCSC genome browser. (C) Plot representing differentially expressed genes between Control and CRX\_OE groups. Significantly up- and down-regulated genes (fold-change > 1.5) are highlighted in red and blue, respectively. (D and E) Significant GO terms enriched in down- (D) and up- (E) regulated genes, respectively, in CRX\_OE experiment. The number of genes enriched in GO terms is shown in the parenthesis. (F) Normalized expression profiles at *NFIB* loci between Control and NFIB\_KD groups. All signals were obtained from the UCSC genome browser. (G) qRT-PCR analysis of expression levels of genes after knockdown of *THRA* (n = 5). Data are means  $\pm$  SEM. All statistics by two-tailed Student's t-test; ns, not significant; \*p < 0.05, \*\*p < 0.01, \*\*\*p < 0.001, \*\*\*\*p < 0.0001.

A

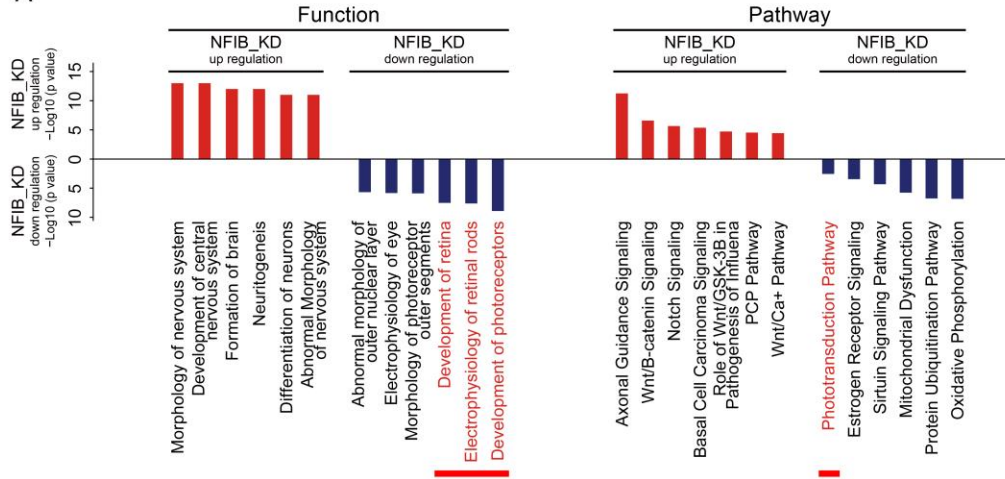

B

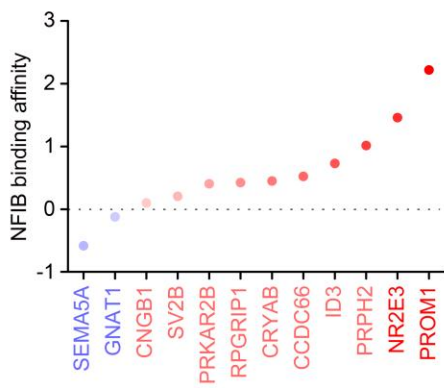

C

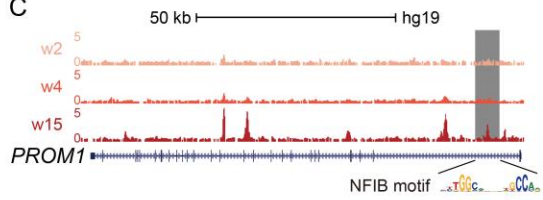

D

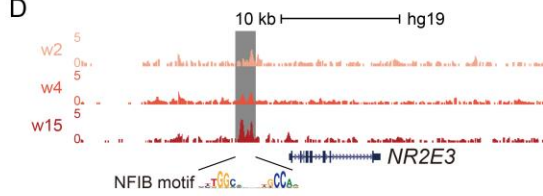

**Fig. S6. *NFIB*-regulated signaling pathways in retinal development.** (A) Significant pathways and functions enriched in down- and up-regulated genes respectively, in *NFIB*\_KD experiment. The result was analyzed with IPA analysis. (B) Dot plot showing the potential of genes that may be regulated by *NFIB*. Each dot represents a different gene. (C and D) Normalized epigenetic profiles at *PROM1* (C) and *NR2E3* (D) loci during RO differentiation. *NFIB* motif occupying at *PROM1* (C) and *NR2E3* (D) loci, respectively. All signals were obtained from the UCSC genome browser.

A GW6 enriched TF Network

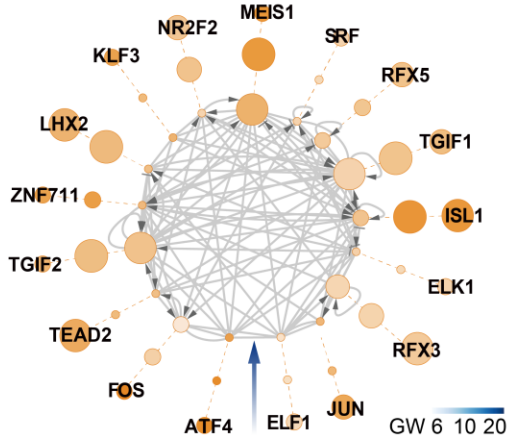

B GW10 enriched TF Network

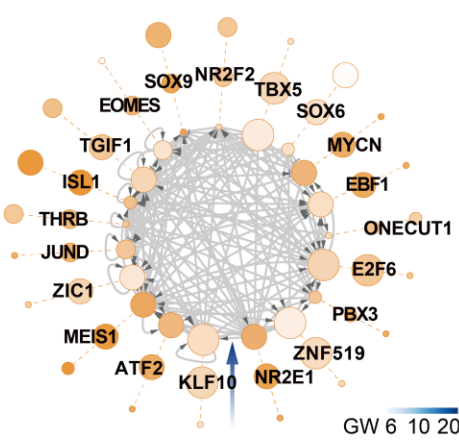

C w6 enriched TF Network

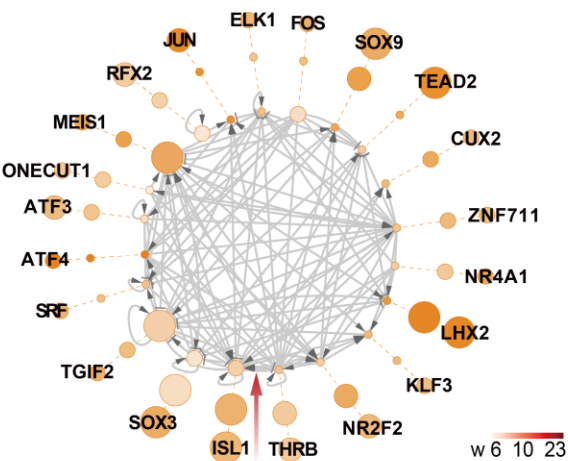

D w10 enriched TF Network

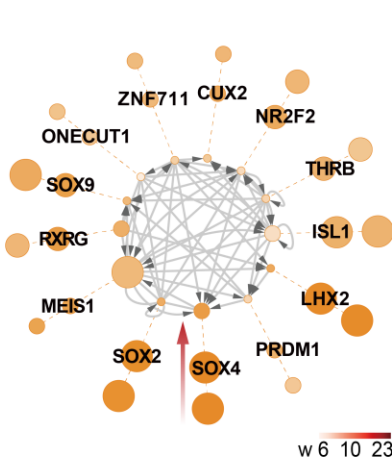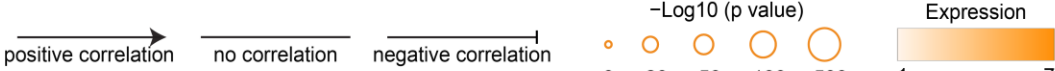

E GW6

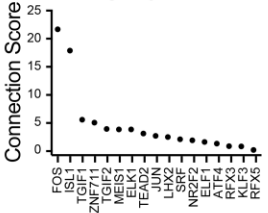

F w6

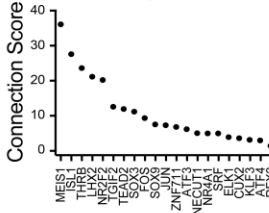

G GW10

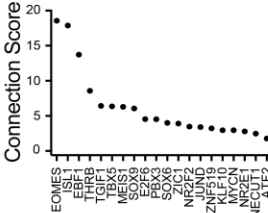

H w10

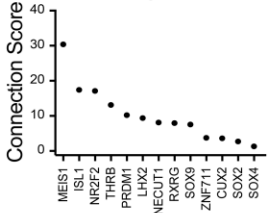

**Fig. S7. Transcriptional regulatory network during human retinal and RO development.**

(**A to D**) Cis-regulatory networks of TFs in GW6 (A), GW10 (B), w6 (C), and w10 (D). Circle groups from inner to outer represent different time points. Arrow on edge from node *X* to node *Y* indicates that TF-*X* regulates TF-*Y* by binding to the promoter site of the latter. Size of each node indicates TF enrichment and color of each node indicates TF expression levels in that stage. Connection types indicate Pearson correlation between gene expression profiles of connected TFs. (**E to H**) Ranking of the connection score in human GW6 (E), GW10 (G) and RO w6 (F), w10 (H) networks. The connection score of each node in the network is calculated as its edge counts multiplied by the standard deviation of its expression.

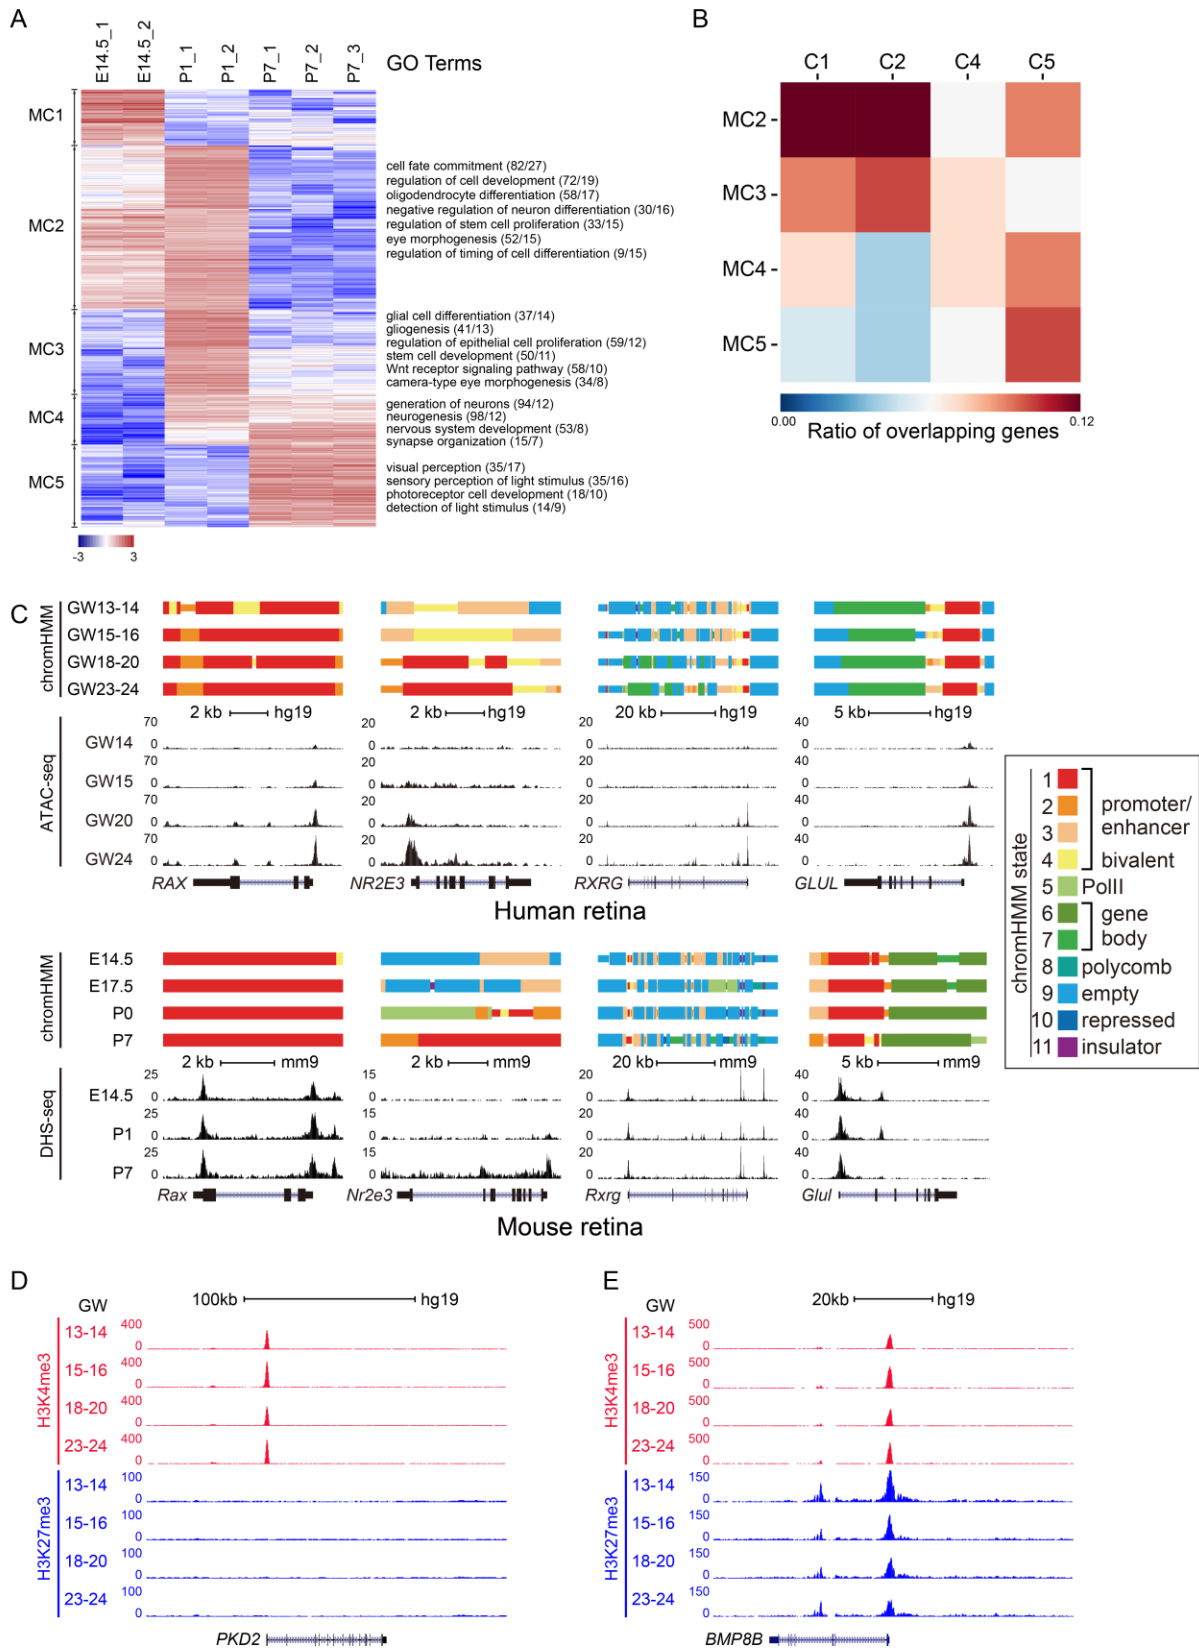



**Fig. S8. Comparative analyses of human and murine epigenetic data during retinal**

**development.** (A) Heatmap of differentially regulatory elements during murine retinal development from DHS-seq data. Each column is a sample and each row is a peak region. Color scale shows relative peak intensity levels. GO terms of each cluster are shown on the right with the number of enriched genes and p values (Number of genes/p value). (B) The ratio of overlapped gene between human and murine retinal development in distinct clusters. We chose the top 500 peaks in each cluster, and applied GREAT to obtain a list of genes regulated by the ATAC-seq peaks. Ratio is calculated by the number of overlapped genes divided by the gene number of corresponding cluster in mouse. (C) ChromHMM states and human ATAC-seq or mouse DHS-seq signals of retinal markers during human retinal development, including *RAX* (retinal progenitors), *NR2E3* (rods), *RXRG* (cones) and *GLUL* (müller cells). Each state is color coded and is used to represent the ChromHMM states (rectangle on the right). (D and E) Normalized H3K4me3 and H3K27me3 profiles at *PKD2* (D) and *BMP8B* (E) gene loci during human retinal development. All signals were obtained from the UCSC genome browser.

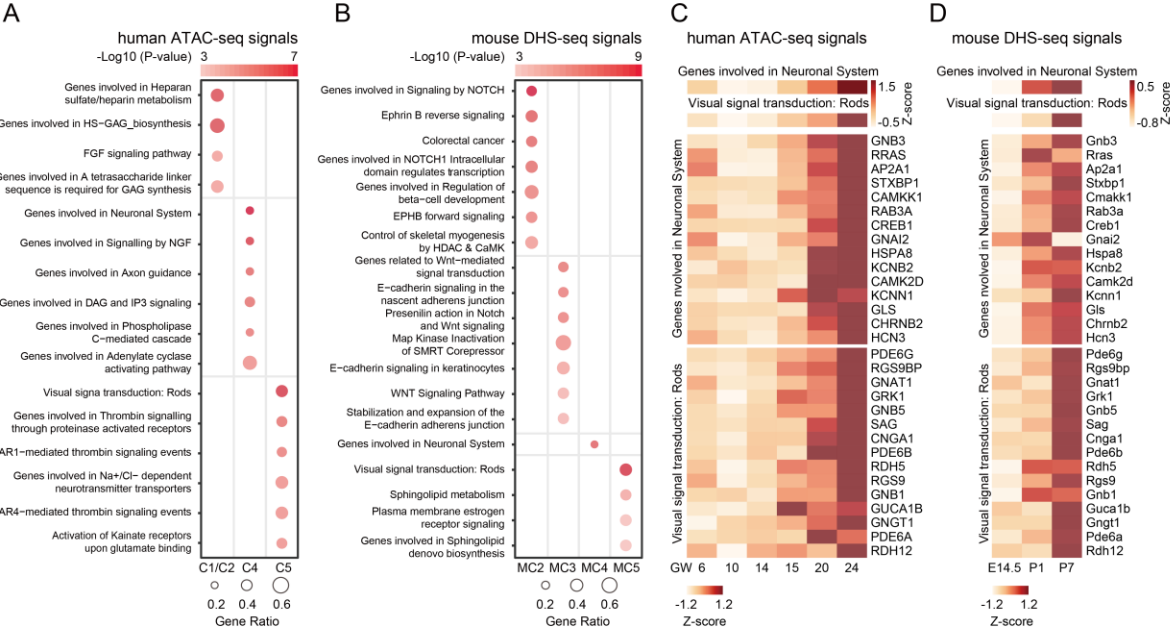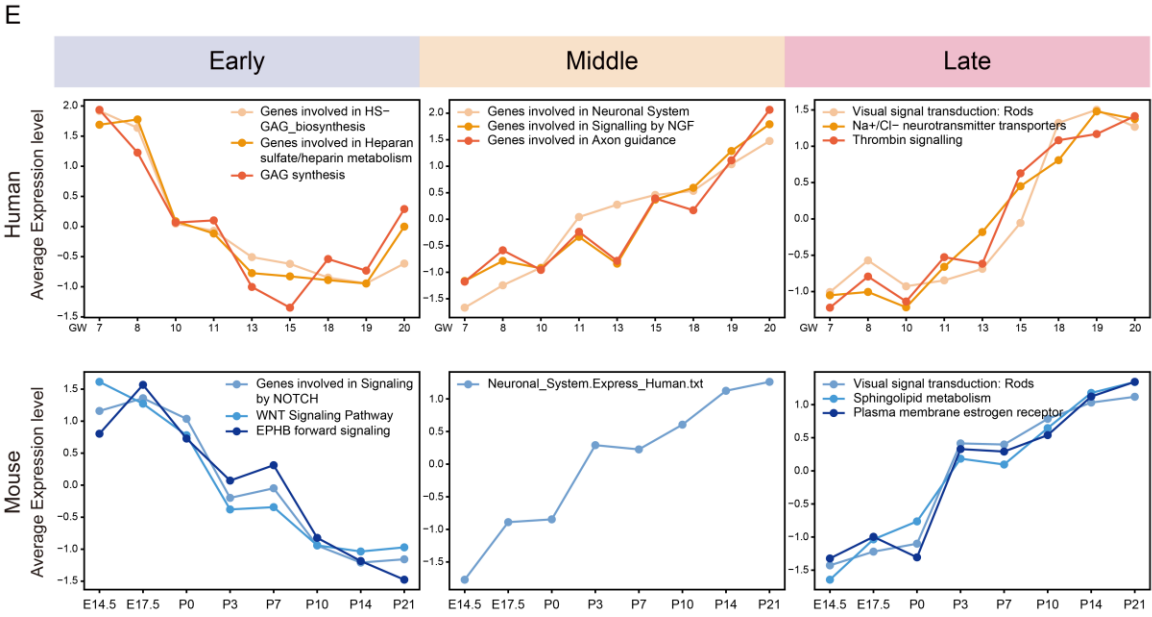

**Fig. S9. Signaling pathways in different stages of retinal development in mouse and human.**

(A and B) Significant pathways enriched in human (A) and murine (B) retinal development using GREAT v3.0.0. Color of each circle represents the enrichment of the pathway, and the size of the circle represents the ratio of the number of genes in the pathway contained in the cluster to the number of all genes in the corresponding pathway. (C and D) ATAC-seq signals of pathways and related genes during human (C) and murine (D) retinal development. The ATAC-seq signal of a gene is calculated by average of the signal value of 10 kb upstream and 1 kb downstream for this gene. ATAC-seq signal of a pathway is the average of the signal values of all genes in this pathway. (E) The average expression level of genes enriched in each pathway in fig. S9, A and B. during human and murine retinal development.

**Table S1. Primers in all experiments.**

|                     |                                                                              |
|---------------------|------------------------------------------------------------------------------|
| Name                | shRNA Primer sequence                                                        |
| CRX shRNA-F         | GATCCCCGGTCTCCGAGCTCCTATTTTCATTCAAGAGAT<br>GAAATAGGAGCTCGGAGACCTTTTTG        |
| CRX shRNA-R         | AATTCAAAAAGGTCTCCGAGCTCCTATTTTCATCTCTTG<br>AATGAAATAGGAGCTCGGAGACCGGG        |
| NFIB shRNA-F        | GATCCCCAAGCCACAATGATCCTGCCAAGAATTTCAA<br>GAGAATTCTTGGCAGGATCATTGTGGCTTTTTTTG |
| NFIB shRNA-R        | AATTCAAAAAAAGCCACAATGATCCTGCCAAGAATTC<br>TCTTGAAATTCTTGGCAGGATCATTGTGGCTTGGG |
| THRA shRNA-F        | GATCCCCGGACAAGGCAACTGGTTATCATTCAAGAGA<br>TGATAACCAGTTGCCTTGTCTTTTTG          |
| THRA shRNA-R        | AATTCAAAAAGGACAAGGCAACTGGTTATCATCTCTT<br>GAATGATAACCAGTTGCCTTGTCCGGG         |
| Name                | Primers for <i>CRX</i> overexpression                                        |
| CRX cDNA F (BamH I) | GCGCGGATCCATGATGGCGTATATGAACCC                                               |
| CRX cDNA R (Spe I)  | GCGCACTAGTCTACAAGATCTGAAACTTCCAGG                                            |
| Name                | qRT-PCR Primer sequence                                                      |
| beta-ACTIN F        | CATGTACGTTGCTATCCAGGC                                                        |
| beta-ACTIN R        | CTCCTTAATGTCACGCACGAT                                                        |
| RCVRN F             | CCTCTACGACGTGGACGGTAA                                                        |
| RCVRN R             | GTGTTTTTCATCGTCTGGAAGGA                                                      |
| CRX F               | TATTCTGTCAACGCCTTGGCCCTA                                                     |
| CRX R               | TGCATTTAGCCCTCCGGTTCTTGA                                                     |
| NRL F               | GGCTCCACACCTTACAGCTC                                                         |
| NRL R               | GGCCCATCAACAGGGACTG                                                          |
| RAX2 F              | GCTCCACCTTCGCAGATG                                                           |
| RAX2 R              | AGCCTGTGCATGTTCTTGG                                                          |
| NFIB F              | AAAAGCATGAGAAGCGAATGTC                                                       |
| NFIB R              | ACTCCTGGCGAATATCTTTGC                                                        |
| EZH2 F              | AATCAGAGTACATGCGACTGAGA                                                      |
| EZH2 R              | GCTGTATCCTTCGCTGTTTCC                                                        |
| THRA F              | AGGTCACCAGATGGAAAGCG                                                         |
| THRA R              | AGTGATAACCAGTTGCCTTGTC                                                       |
| ARNTL F             | CATTAAGAGGTGCCACCAATCC                                                       |
| ARNTL R             | TCATTCTGGCTGTAGTTGAGGA                                                       |
| GNAT1 F             | CACGATGCCCAAGGAGATGT                                                         |
| GNAT1 R             | GGTGGTTGCAGATGCTGTTG                                                         |
| RHO F               | ACAGGATGCAATTTGGAGGGC                                                        |
| RHO R               | GTCATGGGCTTACACACCA                                                          |
| OPN1SW F            | CCTGGCTACCTGGACCATTG                                                         |
| OPN1SW R            | TAGGACTCGCTGCGGTATTTG                                                        |
